# Supplementary material
Source: Springer Nature journal article supplement (https://www.springermedizin.de/resource/supplementary/13002_2005_11_MOESM1_ESM.pdf/9626764)

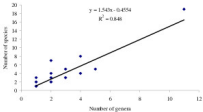

Supplement: MOESM1 [file 9626764]
